Hendel et al.

1 **Diffusion as a ruler: Modeling kinesin diffusion as a length sensor for intraflagellar**  
2 **transport**

3

4 Nathan L. Hendel,<sup>1,2</sup> Matt Thomson,<sup>3</sup> and Wallace F. Marshall<sup>1\*</sup>

5 1. Department of Biochemistry and Biophysics, University of California, San Francisco,  
6 CA, 94158, USA

7 2. Integrative Program in Quantitative Biology, University of California, San Francisco,  
8 CA, 94158, USA

9 3. Division of Biology and Biological Engineering, California Institute of Technology,  
10 Pasadena, CA, 91125, USA

11 \*Correspondence: [Wallace.Marshall@ucsf.edu](mailto:Wallace.Marshall@ucsf.edu)

12

13

14 **ABSTRACT**

15 An important question in cell biology is whether cells are able to measure size, either whole cell  
16 size or organelle size. Perhaps cells have an internal chemical representation of size that can be  
17 used to precisely regulate growth, or perhaps size is just an accident that emerges due to  
18 constraint of nutrients. The eukaryotic flagellum is an ideal model for studying size sensing and  
19 control because its linear geometry makes it essentially one-dimensional, greatly simplifying  
20 mathematical modeling. The assembly of flagella is regulated by intraflagellar transport (IFT), in  
21 which kinesin motors carry cargo adaptors for flagellar proteins along the flagellum and then  
22 deposit them at the tip, lengthening the flagellum. The rate at which IFT motors are recruited to  
23 begin transport into the flagellum is anticorrelated with the flagellar length, implying some kind

Hendel et al.

24 of communication between the base and the tip and possibly indicating that cells contain some  
25 mechanism for measuring flagellar length. Although it is possible to imagine many complex  
26 scenarios in which additional signaling molecules sense length and carry feedback signals to the  
27 cell body to control IFT, might the already-known components of the IFT system be sufficient to  
28 allow length dependence of IFT? Here, we investigate a model in which the anterograde kinesin  
29 motors unbind after cargo delivery, diffuse back to the base, and are subsequently reused to  
30 power entry of new IFT trains into the flagellum. By modeling such a system at three different  
31 levels of abstraction we are able to show that the diffusion time of the motors can in principle be  
32 sufficient to serve as a proxy for length measurement. In all three implementations, we found  
33 that the diffusion model can not only achieve a stable steady-state length without the addition of  
34 any other signaling molecules or pathways, but also is able to produce the anticorrelation  
35 between length and IFT recruitment rate that has been observed in quantitative imaging studies.

Hendel et al.

36 INTRODUCTION

37 How does the cell know how big to make its organelles? This question has been puzzling cell  
38 biologists for decades. Cells must have a robust and efficient procedure for building organelles  
39 with a specific size and shape. The stochastic kinetics of polymerization typically leads to  
40 formation of structures with widely varying sizes in the absence of any size-dependent assembly  
41 or disassembly processes (1). But organelles are thousands of times bigger than the materials  
42 used to measure and build them. How can molecular pathways of assembly sense and respond to  
43 organelle size to yield organelles of a necessary size for proper function? This problem is  
44 extremely difficult to solve in the general case considering the many different types of organelles  
45 and their often highly complex structures. In order to simplify the problem, we will just consider  
46 the eukaryotic flagellum. Flagella (also known as cilia) are long whip-like appendages  
47 protruding from certain cells, and are used for both locomotion and sensing. Unlike a prokaryotic  
48 flagellum, which is made of a tube of a single polymer, the eukaryotic flagellum is a more  
49 complex structure made of nine microtubule doublets underlying a structure of the plasma  
50 membrane. These doublets are nucleated by the basal body. The flagellum is the perfect  
51 organelle to model mathematically because it has a linear geometry: when it grows, it gets longer  
52 but not wider, making it essentially a one-dimensional organelle.

53

54 Here, we will consider the flagella of *Chlamydomonas reinhardtii*, a eukaryotic alga that has two  
55 flagella. When *Chlamydomonas* develop, their flagella grow with decelerating kinetics,  
56 ultimately leveling out to a steady-state length (2). This slow-down in growth suggests that some  
57 part of the flagellum-building mechanism can recognize when the flagellum is long enough. The  
58 present study examines how this might happen.

Hendel et al.

59  
60 Most of the flagellum-building machinery is understood. To build a flagellum, cells use a process  
61 called intraflagellar transport, or IFT (3, 4, 5, 6). IFT, diagrammed in Figure 1A, is mediated by  
62 complexes of approximately 20 polypeptides called IFT proteins, which contain numerous  
63 protein-protein interaction domains capable of binding the building blocks of flagella such as  
64 tubulin and axonemal dynein arms. These IFT protein complexes associate into linear arrays  
65 known as “trains” (7,8). IFT trains are pulled to the distal tip by heterotrimeric kinesin-2 motors  
66 (9,10). Upon reaching the tip, the contents of the cargo add to the length of the flagellum.  
67 Flagella are thus undergoing continuous incorporation of new tubulin and other building blocks.  
68 To counter this, tubulin is continually removed from the flagellar tip at a constant, length-  
69 independent rate. Since this decay rate is constant, in order to achieve a steady state, the rate of  
70 IFT must be length-dependent (11,12).

71  
72 IFT trains are recruited from docking sites on the basal bodies (13) into the flagellum to begin  
73 transport through a process called injection. The physical mechanism of injection is unknown,  
74 but it is thought to involve IFT trains moving through some sort of selective pore or barrier  
75 similar to a nuclear pore (14, 15). While the molecular details of the injection process remain  
76 unclear, quantitative imaging studies (16) have revealed that motors are recruited into the  
77 flagellum according to a pattern of dynamics similar to how sand dropped onto a sandpile will  
78 fall off (avalanche) if the pile is high enough. For example, the more time elapses before a train  
79 is injected, the larger the train is, and the larger a train is injected, the more time will elapse  
80 before the next injection event. The sizes of the injection events are power-law distributed,  
81 similar to the size of avalanching events in sandpiles and other avalanching systems. These



Hendel et al.

82 similarities suggest a simple model in which IFT proteins and motors accumulate at the basal  
83 body, gradually exerting more force on the pore until eventually a cluster of motors pushes  
84 through the pore, injecting a train (16). In such a scenario the rate at which motors accumulate at  
85 the base would ultimately be what determines the rate of injection.

86

87 Quantitative live cell imaging (16, 17) has shown that the rate of recruitment of motors is  
88 anticorrelated to the length of the flagellum. Furthermore, quantitative analysis of IFT cargo  
89 loading suggests that cargo loading is also length-dependent (18). These length-dependencies  
90 imply some kind of communication between the base and the tip. Perhaps some sort of additional  
91 signaling pathways have evolved that can sense length, transduce length into some form of  
92 molecular signal, and then use this signal to modulate the injection of IFT proteins at the base of  
93 the flagellum. Several possible models for length-sensing pathways have been described and  
94 analyzed (16, 19). Each of these models invokes additional molecular pathways that could  
95 transduce length into a signal that would gate entry of IFT particles through a pore. Is it  
96 possible, however, that no such additional pathway exists, and that the IFT machinery itself  
97 might be capable of responding to changes in flagellar length?

98

99 Here we consider a model that takes into account the return of motors from the flagella tip. IFT  
100 is a cyclical process: IFT trains and motors move to the tip, deliver cargo, return to the cell body,  
101 and then are re-injected (20). Experimental data has addressed how motors are recruited onto the  
102 flagellum, how motors get to the tip, and how the flagellum grows and shrinks. Two aspects of  
103 the IFT system that have been less intensively studied are how motors are sent to the pool at the  
104 basal body and what happens to the anterograde kinesin motors after they deliver their cargo to

Hendel et al.

105 the tip. We propose a simple model to answer both of these questions: after dropping off their  
106 cargo, the motors unbind and diffuse back to the base, where they are then added back into the  
107 pool of accumulated motors waiting to be injected. The initial evidence for a diffusive return of  
108 the kinesin motor is the failure to observe processive retrograde traces in kymographs of IFT  
109 using GFP-tagged kinesin subunits (17), and the fact that when retrograde IFT is inhibited,  
110 flagella accumulate IFT proteins at the tip but not the kinesin motor (21). Direct tracking of  
111 individual trains by a novel bleach-gate method has shown that kinesin undergoes diffusion after  
112 dissociation from trains at the distal tip (22). In considering simple models for IFT that  
113 incorporate diffusive return of kinesin, we observed that the rate of diffusive return of kinesin  
114 motors to the pool at the flagellar base can serve as a proxy for flagellar length measurement,  
115 leading us to propose that the diffusion of the IFT kinesin motor may, itself, be the long-sought  
116 length sensor that regulates IFT injection.

117

118 In this paper, we investigate this hypothesis using models constructed at three different levels of  
119 abstraction: a fine-grained agent-based model that is analyzed using computer simulations, a  
120 stochastic process model that is investigated using linear algebra, and a coarse grained  
121 differential equation model that can be solved analytically. In the agent-based model, we  
122 explicitly model the flagellum and motors and run time dynamics simulations. In the stochastic  
123 process model, we construct a transition matrix and use its mathematical properties to determine  
124 a steady state. In the differential equations model, we solve the steady state form of the diffusion  
125 equation with boundary conditions that incorporate active delivery of IFT to the tip and diffusive  
126 return to the base. Each model is detailed below.

127

Hendel et al.

128 AGENT-BASED MODEL

129 As a starting point to look for potential length dependencies in the IFT system, we implemented  
130 a simplified model of the individual components of the system (Figure 1B) and asked what  
131 predictions this model might make about length dependence. We built an agent-based model to  
132 simulate kinesin and microtubule growth dynamics through stochastic rules grounded in  
133 biochemistry. Specifically, we used Python's built-in object oriented programming methods to  
134 explicitly model individual motors and the flagellum they populate.

135

136 The flagellum has attributes including length and environmental variables including decay rate  
137 and diffusion coefficient. The motors each have attributes including position, transport speed, if  
138 they are bound, and if they are on the flagellum or in the base. To simulate dynamics, we cycle  
139 through each motor and test a series of conditionals to determine how it should adjust its  
140 position. If it is on the flagellum and bound, it moves a constant rate forward. If it reaches the tip  
141 of the flagellum, it unbinds, and the flagellum grows by the designated growth increment. If it is  
142 in the flagellum and unbound, it moves randomly to the left or to the right. If it is unbound and  
143 reaches the base, it is absorbed into the base and becomes inactive. At each time step, we count  
144 the number of motors in the base, and if that value is greater than a variable for avalanche  
145 threshold, we use a Weibull distribution to determine how many should avalanche out and move  
146 into the flagellum, and reactivate into active transport. We chose a Weibull distribution because  
147 it can fit the long-tailed distribution of train sizes that have been experimentally determined (16).  
148 The Weibull distribution has a multiplicative constant that we set to the difference between the  
149 number of motors in the base and the threshold for avalanching, plus a constant we could vary.

Hendel et al.

150 Meanwhile, at each time step, the flagellum shrinks by the decay rate constant. Table 1 lists

151 parameters we used, and how we obtained the values used for simulation.

152

153 Table 1.

| <b>Parameter</b>                 | <b>Default value</b>          | <b>How value was obtained</b> | <b>Notes</b>                                                            |
|----------------------------------|-------------------------------|-------------------------------|-------------------------------------------------------------------------|
| Number of motors                 | 200                           | Marshall et al, 2001 (11)     |                                                                         |
| Active transport speed           | 2 $\mu\text{m/s}$             | Chien et al., 2017 (22)       |                                                                         |
| Growth size per motor            | 1.25 nm                       | Marshall et al., 2001 (11)    |                                                                         |
| Decay rate                       | 0.01 $\mu\text{m/s}$          | Marshall et al., 2001 (11)    |                                                                         |
| Diffusion coefficient            | 1.75 $\mu\text{m}^2/\text{s}$ | Chien et al., 2017 (22)       |                                                                         |
| Weibull distribution<br>power    | 2.85                          | Ludington et al., 2013 (16)   |                                                                         |
| Weibull distribution<br>constant | 10                            | Arbitrary                     |                                                                         |
| Avalanche threshold              | 30 motors                     | Ludington et al., 2013 (16)   |                                                                         |
| Binding on                       | 0                             | Arbitrary                     | Probability for<br>each diffusing<br>motors to bind to<br>the flagellum |
| Binding off                      | 0                             | Arbitrary                     | Probability for<br>each bound motor<br>to unbind from the<br>flagellum  |

Hendel et al.

154

155 This model lets us consider the journey of a single motor (Fig. 2A). In this example, it starts at  
156 position 0, with the bound parameter set to True. The conditional that checks if it is bound  
157 commands its position to increase by the active transport step size. This process continues until  
158 the position of the motor is equal to the length of the flagellum. This position represents the tip,  
159 and at this stage, the motor's bound parameter is changed to False, and the length of the  
160 flagellum is increased by the build size parameter. In the next time step, the conditional that  
161 checks if the motor is bound sees that it is not bound, and this time it adjusts its position by the  
162 diffusion length multiplied by either 1 or -1, determined randomly. This simulates the  
163 randomness of diffusion. Once its position reaches 0 (the base), its Boolean value stating whether  
164 it is active (meaning, on the flagellum or diffusion) is set to False to indicate absorption to the  
165 basal pool. Every time step, a random power law number generator determines how many motors  
166 that are inactive at the base are injected onto the flagellum. This process then repeats for the  
167 remainder of the simulation. By saving the flagellum's length after each time iteration, we can  
168 plot its length over time curve shown in figure 2B.

169

170 Simulations over time show that this system allows the flagellum to grow to a defined length  
171 with decelerating kinetics (Fig. 2B). This diffusion-based control scheme is robust and works for  
172 a wide range of parameters.

173

174 Because motors undergo random motion as they return, and are released from the base in a way  
175 that depends on the time history of their return, it is expected that flagellar growth rates will  
176 fluctuate, and indeed our simulations confirm that the length does indeed fluctuate around a

Hendel et al.

177 steady state average length (Fig. 2C). By counting motors in different states, we can ask how the  
178 pool of diffusing motors is distributed along the length. We find that the probability of finding a  
179 motor at a give distance from the tip is approximately linear, consistent with the expected form  
180 of a diffusional gradient at steady state (Fig. 2D).

181  
182 Having found that the simple agent-based model of diffusive kinesin return is able to produce a  
183 defined flagellar length, the key question is whether the length-dependence of IFT injection can  
184 be recapitulated. As shown in Figure 2E, the average injection size per unit time of injected IFT  
185 trains in the simulation shows an inverse dependence on flagellar length, as previously reported  
186 in experimental measurements (16, 17).

187  
188 The length control system modeled here is stable, as indicated by simulated experiments in  
189 which the length is transiently perturbed. As illustrated in Figure 2F, transient elongation of the  
190 flagellum is followed by a shortening back to the steady state length. Once the flagellum reached  
191 steady state, we manually doubled its length and resumed the simulation until the flagellum  
192 reached steady state again. This implies that the steady state length is determined by the input  
193 parameters rather than the transient state of the flagellum.

194

## 195 **TRANSITION MATRIX MODEL**

196 In order to understand why this diffusion-based mechanism actually works and how it depends  
197 on parameters, one approach would be to explore the entire parameter space of the model using  
198 exhaustive methods, but this would require a prohibitive number of simulations. We therefore  
199 seek a more abstract model that can be analyzed mathematically to yield a more intuitive

Hendel et al.

200 understanding of why the model works the way it does. To this end, we modeled the flagellum as  
201 a column vector  $N(t)$ , with each element in the vector representing the number of motors at that  
202 location processing along the flagellum at time  $t$ . We then extended that vector to twice the  
203 length of the flagellum, with each element in the second half representing the number of motors  
204 diffusing at the corresponding location. Finally, we extended the vector by one element to  
205 represent the number of motors in the base. We can then represent the dynamics of the entire  
206 system using a stochastic matrix  $M$  such that  $M*N(t) = N(t+1)$ .

207  
208 Figure 3A shows an example transition matrix  $M$  representing the dynamics of a flagellum of  
209 length 4. To construct  $M$ , we need to consider several constraints. First, the number of motors in  
210 the system must be conserved, so the sum of the elements in the state vector  $N(t)$  must remain  
211 constant throughout all  $t$ . The columns can be thought of as the spread of a point source after one  
212 time step. Specifically, if the value of the state vector component at position  $j$  at time  $t$  is  $n_j$ , the  
213 transition matrix will redistribute those  $n_j$  motors into a new distribution, governed by the values  
214 in  $M$ . Since every motor needs to end up in some position (given conservation of total motor  
215 number), the entries in the whole column must sum to 1. The condition that each column in  $M$   
216 must sum to 1 defines  $M$  as a left stochastic matrix. This property of the matrix will help us later  
217 determine the steady state of the system and solve the length control problem.

218  
219 Second, the matrix must simulate active transport for the top half of the state vector, diffusion for  
220 the bottom half, and absorption/recruitment to send motors from the bottom value to the top  
221 value. Since we constructed the state vector such that the first  $L$  values represent bound (i.e.  
222 transporting) motors, the top left quadrant of the transition matrix  $M$  will represent the active

Hendel et al.

223 transport dynamics. Active transport is simply moving some percent of motors one unit forward  
224 and keeping the remaining motors at their current position at each time step, so the active  
225 transport quadrant of the matrix will have positive values on the diagonal and one position under  
226 the diagonal.

227

228 The diffusion region of the transition matrix must apply to motors that have moved past position  
229  $L$  in the state vector. This means that the lower right quadrant of the transition matrix  $M$  must  
230 simulate the dynamics of diffusion. We can incorporate the random walk nature of diffusion into  
231 this matrix by stating that the probability of staying in the same position is high, and the position  
232 of moving one position to either side is low. This simulates the Gaussian spread of a diffusing  
233 point source after a small time (we keep the time small so there is a negligible chance of  
234 diffusion two units away).

235

236 Notice that the first column incorporates the reflecting boundary condition that motors cannot go  
237 past the tip, so the odds of staying at the tip are the odds of not moving anywhere (here 0.98)  
238 plus the odds of moving past the tip and bouncing off (here 0.01). Also note that the way our  
239 state vector is constructed, motors diffusing in the direction of the base are going down the state  
240 vector towards lower rows. This matches the order in which vector elements representing  
241 diffusing kinesins are specific in the state vector

242

243 With the aforementioned elements of  $M$  specified, we are able to represent how the motors can  
244 actively transport to the tip, unbind, diffuse back to the base, and absorb at the base so that  
245 motors enter the inactive pool. We still need to add the final element of our dynamics into the



Hendel et al.

246 matrix: injection. A simple way to do this is to assume that at each time step, the base sends  $p$   
247 percent of the motors in the base back to the flagellum for active transport. This means that  $1-p$   
248 represents the proportion of motors that stay in the base. Such an assumption is a simplified  
249 representation of the quasi-periodic avalanching process, and may need to be relaxed in future  
250 simulations. The last column in  $M$  represents the spread of motors that were previously at the  
251 base. To incorporate avalanching and recruitment into this column, we simply make the column  
252  $[p \ 0 \ 0 \ \dots \ 0 \ 0 \ 1-p]^T$ , where  $p$  is the probability of a motor being injected.

253  
254 Now all the columns in the matrix sum to 1, so the condition for being a stochastic matrix are  
255 satisfied. The probability of different states evolves in a strictly deterministic manner determined  
256 by successive matrix multiplications. For example, if the diffusion half of the state vector is  $[0 \ 1$   
257  $0 \ 0]^T$ , applying  $M$  will result in a new state vector whose elements are real numbers in the range  
258 0 to 1 that represent the probability of a motor occupying that position in the state vector. This  
259 makes sense physically in the assumption that there are a large number of motors in the system,  
260 and since the number is on the order of 200 motors, this is a reasonable approximation.

261  
262 One limitation of this construction of the transition matrix is that it assumes a constant flagellum  
263 length. The length determines the size of the matrix, so to simulate length dynamics over time,  
264 we would need to continuously alter the size of the matrix. To avoid this inconvenience, we can  
265 instead directly calculate the steady state behavior as a function of flagellar length. The steady  
266 state solution  $N_{ss}$  must satisfy  $M * N_{ss} = N_{ss}$ , so  $N_{ss}$  is an eigenvector of  $M$  with eigenvalue 1.  
267 The Perron-Frobenius theorem states that the largest magnitude eigenvalue of stochastic,  
268 nonnegative, and irreducible matrix is always simple and equal to 1. Our motor transition matrix

Hendel et al.

269 is stochastic (i.e. Markov) because the columns each sum to 1. It is nonnegative because all  
270 values are greater than or equal to zero. Finally, it is irreducible because each node has a path to  
271 get to every other node after some number of time steps. For example, a motor in the middle of  
272 active transport has a path leading through every subsequent active transport node, then it  
273 connects to a diffusion node, and each diffusion node is connected to a subsequent diffusion  
274 node, the last one connects to the base node, which connects to the first active transport node.  
275 This means we can apply the Perron-Frobenius theorem for nonnegative irreducible matrices to  
276 this stochastic matrix, proving that the eigenvalue of 1 always exists and is unique, and  
277 corresponds to a principal eigenvector corresponding to the steady state number distribution ( $N_{SS}$   
278 in our example). This also means that the system is robust, and all sizes of the matrix  $M$  will  
279 yield a steady state solution. Because all other eigenvalues must have magnitudes less than 1, the  
280 corresponding eigenvectors will decay in any superposition state, so the same steady state  
281 solution will always be attained regardless of initial state. No change to the numerical values of  
282 the parameters in the model will cause the matrix  $M$  to violate the conditions of the Perron-  
283 Frobenius theorem, hence there will always be a unique steady state no matter how the  
284 parameters are altered. This property of stable length control is a robust feature of the system.  
285  
286 This method represents IFT in a flagellum at any fixed length, which determines the size of the  
287 state vector and transition matrix. The flagellum grows when motors with cargo reach the tip,  
288 and shrinks through a constant, length-independent decay. When the number of motors arriving  
289 at the tip times the growth per motor equals the decay in some time interval, the net length  
290 change will be zero. Since motors in active transport move at a constant rate, the number of  
291 motors injected into active transport is the only factor that controls the number arriving at the tip

Hendel et al.

292 per second. This value can be expressed as the number of motors in the base multiplied by  $p$ , the  
293 fraction of motors in the base that get injected into active transport. We can therefore define the  
294 critical rate of motors that must arrive at the tip to maintain a steady state length as  $G =$   
295  $d/(\delta L * p)$ , where  $d$  is the decay rate and  $\delta L$  is the growth increment when a single motor reaches  
296 the tip. The value of the steady state number density vector  $N_{SS}$  in position  $(2L+1)$  is the number  
297 of motors at the base. This means that when  $N_{SS}(2L+1) > G$ , there are enough motors at the tip  
298 that the flagellum will grow. If  $N_{SS}(2L+1) < G$ , there are too few motors to counteract the decay,  
299 so the flagellum will shrink. This means that when  $N_{SS}(2L+1) = G$ , the growth factor from  
300 motors at the tip perfectly cancels the decay rate. Therefore, when  $N_{SS}(2L+1) = G$ , the matrix is  
301 the right size to encode a flagellum that reaches steady state length.

302

303 We can find this matrix by creating transition matrices corresponding to a range of lengths,  
304 finding each matrix's principle eigenvalue, and examining the value of the corresponding  
305 eigenvector at position  $(2L+1)$ . Figure 3B shows the values at this position as a function of  $L$ .  
306 The horizontal line represents the value of  $G$  given by the default parameters in the agent-based  
307 model. The matrix that intersects the line at  $G$  is the one with the steady state length. The  
308 difference between this steady state length and the result from the agent-based model may be  
309 explained by the different implementation of avalanching between the models. Note the inverse  
310 relationship between injection rate and flagellar length, matching experimental results (16). A  
311 possible future direction for this model is making the separation between elements in the matrix  
312 correspond to a smaller unit of length, or perhaps a continuous differential equation, allowing us  
313 to precisely predict final length. The equilibrium here is stable, reiterating the point that the  
314 length would modulate until it reaches steady state. It also means that this system is robust,

Hendel et al.

315 because any parameter adjustment would retain the stable equilibrium. This model also predicts  
316 that the gradient of diffusing motors is linear (Fig. 3C), like in the agent-based model. The  
317 benefit of the matrix model in addition to the agent-based model is that it provides an  
318 intermediate level of scale that proves stability and robustness, and that it is efficient to vary  
319 biochemical parameters and find the steady state solution.

320

### 321 **DIFFERENTIAL EQUATIONS MODEL**

322 The stochastic process model described above provides a simplification of the initial agent-based  
323 model, but it still requires numerical solutions to find steady state distributions of motors. We  
324 therefore investigate an even more idealized model that will allow us to solve for the steady state  
325 solution analytically, so as to determine the influence of key parameters on system behavior.  
326 If we make the assumption that active transport time and expected time delay of injection is  
327 small relative to the timescale of diffusive return, we can model this system as a diffusion  
328 problem with a constant source of free motor protein at the tip of the flagellum and a sink at the  
329 base. If we also assume that no diffusing motors re-bind to the flagellum, we can apply Fick's  
330 first law of diffusive flux in steady state. This law strictly applies to steady state, however we can  
331 still use it to study the dynamics of flagellar growth by invoking a separation of timescales. We  
332 assume that the timescale of flagellar length changes due to growth and shrinkage, which  
333 happens on the timescale of minutes to hours, is slow relative to the timescale over which  
334 diffusion establishes a stable gradient, such that the system can be viewed as being in a quasi-  
335 steady state. (This similar to the classic statistical mechanics problem of slowly expanding a box  
336 containing gas: when the expansion of the box is slow, the system is reversible and equilibrium  
337 statistical mechanics theory can be applied. A simple validation of this is that a single motor

Hendel et al.

338 reaching the tip increases the length by 1.25nm in our simulation, and it takes 4.5e-7 seconds for  
339 a diffusing motor's mean square displacement to equal 1.25nm, which is negligible compared to  
340 the time it takes to diffuse back to the base, roughly 18 seconds).

341

342 The strategy for deriving an expression for steady state length is to determine the expected flux  
343 of diffusing motors arriving at the base, equate the flux to the number of motors diffusing from  
344 the tip (following our assumptions that injection time and active transport time are very small  
345 compared to diffusion time), convert that flux into a dynamic growth term, and then find the  
346 steady state at which this growth is balanced with the decay term.

347

348 The resulting expression for steady state length is the following:

349

350 
$$L_{ss} = \left( \frac{2ND\delta L}{d} \right)^{\frac{1}{2}},$$

351 Equation 1,

352

353 where  $N$  is the number of diffusing motors,  $D$  is the diffusion coefficient,  $\delta L$  is the increment of  
354 flagellar growth when a motor reaches the tip, and  $d$  is the decay rate.

355

356 It can be shown from first principle random walk distance distributions that the time it takes to  
357 move a root-mean-square distance  $L$  is:

358 
$$t = \frac{L^2}{2D}.$$

359 The current of motors  $I$  reaching the base is equal to the number of diffusing motors  $N$  divided  
360 by the average time it takes to diffuse to the base.

Hendel et al.

361 
$$I = \frac{N}{t} = \frac{2ND}{L^2}.$$

362 In the approximation in which motors that have reached the base immediately transport back to  
363 the tip, the flagellum grows by the current of motors reaching the base multiplied by the growth  
364 increment per motor  $\delta L$ . The competing decay term  $d$  is length-independent.

365 
$$\frac{dL}{dt} = \frac{2ND\delta L}{L^2} - d.$$

366 At steady state,  $\frac{dL}{dt} = 0$ , so it is simple to solve for the steady state length  $L_{SS}$ .

367 
$$L_{SS} = \left(\frac{2ND\delta L}{d}\right)^{\frac{1}{2}}.$$

368  
369 An identical result can be obtained by solving the diffusion equation for appropriate boundary  
370 conditions and then expressing the motor return rate in terms of the flux at steady state.

371  
372 This predicts that the steady state length of the flagellum is proportional to the square root of its  
373 diffusion coefficient, motor number, and unit length increase per motor. It also predicts that it is  
374 inversely proportional to the square root of the decay rate. Note that since the model proposed  
375 does not invoke any unknown transducer molecules or pathways, but instead directly represents  
376 all of the molecular players, there is no need for any undetermined constant of proportionality.

377  
378 Note that  $N$  here represents number of diffusing motors, not total motors. In our assumption that  
379 injection frequency and active transport are fast,  $N$  is equal to the number of diffusing motors,  
380 and when these assumptions break, there should be some correction term, perhaps  $N_{\text{effective}} = N_{\text{total}}$   
381 – (threshold for avalanching). Unless otherwise specified, in our simulations we used  
382 threshold=1, so  $N=199$  out of 200 motors.

Hendel et al.

383

384 By running simulations in the agent-based model over a range of parameters, we can verify that  
385 this relation matches the results of fine-grained agent based simulations. (Fig 4). To simulate our  
386 assumptions, these simulations have an avalanching threshold of 1 and an active transport speed  
387 of  $200 \mu\text{m/s}$  (enough to go the entire length of the flagellum in one time step). This deals with  
388 the regime of high active transport velocities, which is neglected by the Markov matrix model.  
389 To correct equation 1 in the future to include low velocities, we would need another small  
390 correction to  $N$ , because slow walkers are essentially motors in the system that are not diffusing.  
391 The similarity between the curve fits and the simulated lengths indicate that equation 1  
392 accurately describes the length of diffusion-regulated flagella.

393

## 394 **DISCUSSION**

### 395 **Diffusion as a ruler**

396 In this model of length sensing, the cell is not sensing length directly, but it is converting a  
397 biochemical signal that obeys the laws of diffusion and using it as a proxy for length  
398 measurement. This is similar to a chemical reaction in which a chemical  $X$  has an assembly term  
399 and a degradation term. The concentration of  $X$  over time is given by a simple differential  
400 equation, and the steady state concentration is determined by a combination of biochemical  
401 parameters. The flagellum is a similar system because the length has assembly and disassembly  
402 terms, and here we predict which specific biochemical parameters are involved (equation 1).  
403 There is a competition between a growth flux term ( $\delta L * N * D$ ) and a decay term  $d$ . It is  
404 important to note that the square root in equation 1 comes from the geometry of the system.

405

Hendel et al.

406 **Relating model to genetics of length control**

407 The simple mechanism modeled here is sufficient to explain length-dependent IFT injection and  
408 stable length control without needing to invoke any new molecular players beyond those already  
409 known. But this does not mean that the model works independently of molecular entities. All of  
410 the model parameters are determined by the biophysical and enzymatic properties of the known  
411 molecular component of the IFT system. It is to be expected that mutations in these molecules  
412 can alter flagellar length in predictable ways, potentially allowing the model to help interpret the  
413 mechanistic basis of previously described flagellar length-altering mutants.

414

415 The diffusion constant of kinesin is mainly a property of the size of the molecule and the  
416 viscosity of the flagellar matrix, and is thus unlikely to be dramatically altered with point  
417 mutations. But it is not hard to imagine that mutations might alter the dynamics of the injection  
418 system at the base. Previous research shows that the *lf4* mutant makes the flagellum longer and  
419 increases the injection rate but without eliminating the length dependence of injection (16). Such  
420 a phenotype could correspond to lowering the threshold of motor buildup required for injection  
421 avalanching, which is a parameter in the agent-based model. High thresholds lead to lower  
422 injection frequency and lower steady state length, and low thresholds lead to higher injection  
423 frequency and higher steady state length. This breaks the assumption of equation 1 that injection  
424 is instantaneous, and essentially it lowers  $N$  by reducing the fraction of motors in diffusion. This  
425 implies that it is possible that the LF4 gene controls the threshold for how big the pile can be  
426 before an avalanche occurs.

427



Hendel et al.

428 Another mutant that we can examine is the FLA10 gene, which codes for the kinesin motors (9).  
429 Temperature-sensitive *fla10* mutants with intact flagella start to lose their flagella when the  
430 temperature shifts into the region that disables FLA10 (9). Growth of *fla10* mutants at  
431 intermediate temperatures, which partially disable the motors, leads to intermediate steady-state  
432 flagellar lengths (11). In our model, this translates to a reduction in  $N$ , the number of motors in  
433 the system. We note that the square-root dependence of steady state length on motor number  
434 (equation 1) means that length will decrease sub-linearly with decreasing motor number. To  
435 reduce length by a factor of 10 would require a reduction in motor number by a factor of 100.  
436 Since motors reaching the tip and delivering cargo is the only mechanism in the model for  
437 flagellum growth, removing every motor makes the flagellum shrink to zero. This is another  
438 prediction of equation 1.

439

#### 440 **Comparison with other studies**

441 A recent study on mouse axons (23) studies the diffusion of kinesin motors as a mechanism for  
442 recycling. Their model for simple diffusion has the same linear distribution of diffusing motors,  
443 but they find that the diffusing motors have a nonzero binding rate onto the flagellum from  
444 diffusion, and therefore the number distribution is exponential. The mouse axon system has a  
445 fixed length, but their work provides an example in biology of diffusion and recycling of kinesin.  
446  
447 Models based on diffusion as a length measurement system have been proposed by Levy (24)  
448 and by Ludington (16). In the model by Levy, the proposed source of the diffusing molecule was  
449 the base, not the tip, and it was assumed that the diffusing species directly affected assembly, as  
450 opposed to our model in which the diffusing molecule affects transport. In the Ludington 2013

Hendel et al.

451 model, RanGTP was the diffusing substance, and the link to injection was indirect, requiring a  
452 gating of entry by activated Ran. In the diffusion model investigated in Ludington 2015, the  
453 identity of the diffusing molecule was not specified and again a transducer system was assumed  
454 to couple the diffusive molecule to the injection system (19). Finally, we note that while a  
455 strength of our model is that length can be sensed and converted into length-dependent IFT  
456 injection without the need to invoke any other molecular players, it has been shown that kinases  
457 inside the flagellar compartment do show length-dependent activity (24, 25). Likewise, flagellar  
458 disassembly can become length dependent when flagella grow outside of a normal length range  
459 (27). It is interesting to consider whether these molecular activities may be dependent on IFT  
460 injection or diffusive return.

461

## 462 **Future Prospects**

463 A fundamental puzzle of flagellar length control has always been how the organelle can measure  
464 length. Our prior results indicated that IFT injection was length dependent but did not explain the  
465 origin of the length dependence, thus raising the possibility that some complex length-measuring  
466 molecular pathway may exist. The results presented above establish that diffusive return of  
467 kinesin motors is, at least in principle, capable of providing a length measurement system for  
468 regulating IFT injection as a function of flagellar length, without requiring any additional  
469 regulatory or sensing components. In other words, the IFT system may contain its own  
470 measurement method based on the physics of diffusion. It is interesting to consider whether this  
471 type of measuring system could be at work in other linear cellular structures such as microvilli or  
472 microtubules.

473

Hendel et al.

## 474 **AUTHOR CONTRIBUTIONS**

475 N.H. wrote the simulations. N.H., M.T., and W.M. developed ideas and worked out math. N.H.  
476 and W.M. wrote the manuscript.

477

## 478 **ACKNOWLEDGEMENTS**

479 We would like to thank Greyson Lewis for help with the math and derivations and Ahmet Yildiz  
480 for sharing results ahead of publication. This work was supported by NIH grant GM097017.

481

## 482 **CODE AVAILABILITY**

483 Code for agent-based simulations and Markov matrix simulations is available at  
484 <https://github.com/nathendel/Hendel-et-al-2017>.

485

## 486 **REFERENCES**

- 487 1. Mohapatra L, Lagny TJ, Harbage D, Jelenkovic PR, Kondev J. 2016. Length control of filamentous  
488 structures in cells by the limiting pool mechanism. bioRxiv doi.org/10.1101/075655
- 489 2. Rosenbaum, J.L., Moulder, J.E., and Ringo, D.L. 1969. Flagellar elongation and shortening in  
490 *Chlamydomonas*. The use of cycloheximide and colchicine to study the synthesis and assembly of flagellar  
491 proteins. *J. Cell Biol.* 41: 600-19
- 492 3. Cole, D., Diener, D., Himelblau, A., Beech, P., Fuster, J., and Rosenbaum, J. (1998). Chlamydomonas  
493 kinesin-II-dependent intraflagellar transport (IFT): IFT particles contain proteins required for ciliary  
494 assembly in *Caenorhabditis elegans* sensory neurons. *The Journal of Cell Biology* 141, 993.
- 495 4. Scholey JM. 2003. Intraflagellar transport. *Ann. Rev. Cell Dev. Biol.* 19: 423-43.
- 496 5. Taschner M, Lorentzen E. 2016. The intraflagellar transport machinery. *Cold Spring Harvor Perspect.*  
497 *Biol.* 8, a028092.
- 498 6. Lehtreck KF, van de Weghe, JC, Harris JA, Liu P. 2017. Protein transport in growing and steady-state  
499 cilia. *Traffic* 18, 277-286

Hendel et al.

- 500 7. Stepanek L, Pigino G. 2016. Microtubule doublets are double-track railways for intraflagellar transport  
501 trains. *Science* 352, 721-4.
- 502 8. Vannuccini E, Paccagnini E, Cantele F, Gentile M, Dini D, Fino F, Diener D, Mencarelli C, Lupetti P.  
503 2016. Two classes of short intraflagellar transport train with different 3D structures are present in  
504 *Chlamydomonas* flagella. 129, 2064-74.
- 505 9. Kozminski KG, Beech PL, Rosenbaum JL. 1995. The *Chlamydomonas* kinesin-like protein FLA10 is  
506 involved in motility associated with the flagellar membrane. *J. Cell Biol.* 131: 1517-27.
- 507 10. Mueller J, Perrone CA, Bower R, Cole DG, Porter ME. 2005. The *FLA3* KAP subunit is required for  
508 localization of kinesin-2 to the site of flagellar assembly and processive anterograde intraflagellar transport.  
509 *Mol. Biol. Cell* 16: 1341-1354.
- 510 11. Marshall, W.F., and Rosenbaum, J.L. 2001. Intraflagellar transport balances continuous turnover of outer  
511 doublet microtubules: implications for flagellar length control. *J. Cell Biol.* 155: 405-414.
- 512 12. Marshall, W.F., Qin, H., Rodrigo Brenni, M., and Rosenbaum, J.L. 2005. Flagellar length control system:  
513 testing a simple model based on intraflagellar transport and turnover. *Mol. Biol. Cell* 16: 270-278.
- 514 13. Deane, J.A., Cole, D.G., Seeley, E.S., Diener, D.R., and Rosenbaum, J.L. (2001). Localization of  
515 intraflagellar transport protein IFT52 identifies basal body transitional fibers as the docking site for IFT  
516 particles. *Curr Biol* 11, 1586-1590.
- 517 14. Dishinger, J.F., Kee, H.L., Jenkins, P.M., Fan, S., Hurd, T.W., Hammond, J.W., Truong, Y.N.-T., Margolis,  
518 B., Martens, J.R., and Verhey, K.J. (2010). Ciliary entry of the kinesin-2 motor KIF17 is regulated by  
519 importin-beta2 and RanGTP. *Nat Cell Biol* 12, 703-710.
- 520 15. Hu, Q., Milenkovic, L., Jin, H., Scott, M.P., Nachury, M.V., Spiliotis, E.T., and Nelson, W.J. (2010). A  
521 septin diffusion barrier at the base of the primary cilium maintains ciliary membrane protein distribution.  
522 *Science* 329, 436-439.
- 523 16. Ludington WB, Wemmer KA, Lechtreck KF, Witman GB, Marshall WF. 2013. Avalanche-like behavior  
524 in ciliary import. *Proc. Natl. Acad. Sci. U.S.A.* 110: 3925-30.
- 525 17. Engel, B.D., Ludington, W.B., and Marshall, W.F. 2009. Intraflagellar transport particle size scales  
526 inversely with flagellar length: revisiting the balance-point length control model. *J. Cell Biol.* 187: 81-9.

Hendel et al.

- 527 18. Wren KN, Craft JM, Tritschler D, Schauer A, Patel DK, Smith EF, Porter ME, Kner P, Lechtreck KF.  
528 2013. A differential cargo-loading model of ciliary length regulation by IFT. *Curr. Biol.* 23: 2463-71.
- 529 19. Ludington WB, Ishikawa H, Serebrenik YV, Ritter A, Hernandez-Lopez RA, Gunzenhauser J, Kannegaard  
530 E, Marshall WF 2015. A systematic comparison of mathematical models for inherent measurement of  
531 ciliary length: how a cell can measure length and volume. *Biophys. J.* 108, 1361-79.
- 532 20. Iomini C, Babaev-Khaimov V, Sassaroli M, Piperno G. 2001. Protein particles in *Chlamydomonas*  
533 flagella undergo a transport cycle consisting of four phases. *J. Cell Biol.* 153: 13-24.
- 534 21. Engel BD, Ishikawa H, Wemmer KA, Geimer S, Wakabayashi K, Hirono M, Craige B, Pazour GJ, Witman  
535 GB, Kamiya R, Marshall WF. 2012. The role of intraflagellar transport in flagellar assembly,  
536 maintenance, and function. *J. Cell Biol.* 199, 151-67.
- 537 22. Chien A, Shih SM, Bower R, Tritschler D, Porter ME, Yildiz A. 2017. Dynamics of the IFT Machinery at  
538 the Ciliary Tip. bioRxiv doi: 10.1101/156844.
- 539 23. Blasius, T. Lynne, Nathan Reed, Boris M. Slepchenko, and Kristen J. Verhey. "Recycling of Kinesin-1  
540 Motors by Diffusion after Transport." *PLOS ONE* 8, no. 9 (September 30, 2013): e76081.  
541 doi:10.1371/journal.pone.0076081.
- 542 24. Levy, E.M. (1974). Flagellar elongation as a moving boundary problem. *Bull Math Biol* 36, 265-273.
- 543 25. Luo, M., Cao, M., Kan, Y., Li, G., Snell, W., and Pan, J. (2011). The phosphorylation state of an aurora-  
544 like kinase marks the length of growing flagella in *Chlamydomonas*. *Curr Biol* 21, 586-591.
- 545 26. Cao, M., Meng, D., Wang, L., Bei, S., Snell, W.J., and Pan, J. (2013). Activation loop phosphorylation of a  
546 protein kinase is a molecular marker of organelle size that dynamically reports flagellar length. *Proceedings*  
547 *of the National Academy of Sciences* 110, 12337-12342.
- 548 27. Hilton, L.K., Gunawardane, K., Kim, J.W., Schwarz, M.C., and Quarumby, L.M. (2013). The kinases LF4  
549 and CNK2 control ciliary length by feedback regulation of assembly and disassembly rates. *Current*  
550 *biology* : CB 23, 2208-2214.

551

Hendel et al.

552 **FIGURES**

553

554 **Figure 1. Agent-based model of IFT.** (A) Diagram of IFT. Kinesin-2 motors form trains that  
555 carry IFT particles containing tubulin to the plus end of the microtubule bundle, the tip of the  
556 flagellum. Dynein motors carry the IFT particles back to the base. (B) Model version of IFT.  
557 Kinesin motors pile up at the base (1), and once the pile is large enough, some are injected into  
558 the flagellum with cargo (2). Each motor constantly moves towards the tip of the flagellum (3).  
559 Once they reach the end, they flagellum gets longer (4), and the kinesin motors unbind and  
560 diffuse (5). Once they diffuse back to the base, they are absorbed and re-enter the pile in the base  
561 (6). While this is happening, the flagellum is shrinking at a length-independent rate.

562

563 **Figure 2. Results of agent-based simulation.** (A) (Blue) journey of a single motor in a zoomed-  
564 in window of the flagellum's early growth, (green) flagellar length. (B) Length over time in  
565 simulated minutes. (C) Zoomed in window of the flagellum's length over time curve in the  
566 steady state regime. (D) (Blue) Distribution of diffusing motors along flagellum using the  
567 average of 103 simulations with identical parameters, then applying a Gaussian kernel density  
568 function to the means, (green) linear fit. (E) Plot of injection size as a function of flagellar length.  
569 The points were generated by simulating 10 cells, taking their injection times and sizes, and  
570 binning them into measurements of average injection size per unit time in each of the 50 evenly-  
571 spaced bins. (F) Stability of length control system. Plot shows simulation in which length was  
572 manually increased to double its steady state length at  $t=30$  min. (Blue) is before the manual  
573 increase, (green) is after, showing restoration to initial steady state length. The time step in each  
574 simulation was 0.01 seconds.

Hendel et al.

575

576 **Figure 3. Markov matrix model.** (A) Example of a transition matrix, here with length 4, active  
577 transport rate of 0.1, diffusion spread of 0.1, and injection rate of 0.2. The relative sizes of the  
578 active transport rate and diffusion rate are roughly equal to the biological parameters used in the  
579 agent-based model, but the injection rate is simplified to a length-independent proportion. Based  
580 on the active transport and diffusion parameters, this matrix advances a state vector forward in  
581 time by 0.05 seconds. (B) Steady-state injection rate as a function of length compared to the  
582 value  $G$  required for equilibrium. (C) Steady state number density (principal eigenvector) for one  
583 set of parameters.  $x = 1:4$  is active transport,  $x = 5:8$  is diffusion,  $x = 9$  is base. Note that the  
584 eigenvector can be scaled to an arbitrary magnitude, here it makes sense to normalize it to sum to  
585 the number of motors in the system, which we set to 200 for consistency with the agent-based  
586 model.

587

588 **Figure 4. Comparison of analytical solution of diffusion equation to agent-based model.**

589 Each plot shows the lengths given by equation 1 and agent-based simulations by varying a single  
590 parameter at a time. The varied parameters are: (A) diffusion coefficient  $D$ , (B) number of  
591 motors  $N$ , (C) decay rate  $d$ , (D) avalanching threshold, (E): length increase per motor  $\delta L$ , (F): all  
592 parameters, using the data from panels A, B, C, and E, and multiplying the variables to match  
593 equation 1, then comparing to final length simulated by the agent-based model. The red curve in  
594 each is the best-fit curve to the curve  $(a*x)^b$  (except the threshold graph, which is  $(a*(200-x))^b$ ),  
595 and the value for the fit power  $b$  is displayed in each legend. The blue curve is the predicted  
596 curve given by equation 1. The points for panels (A), (B), (C), and (E) were uniformly sampled

Hendel et al.

597 in log space, so there are the same number of points between the default and one order of

598 magnitude below as there are between the default and one order of magnitude above.

599



**A**

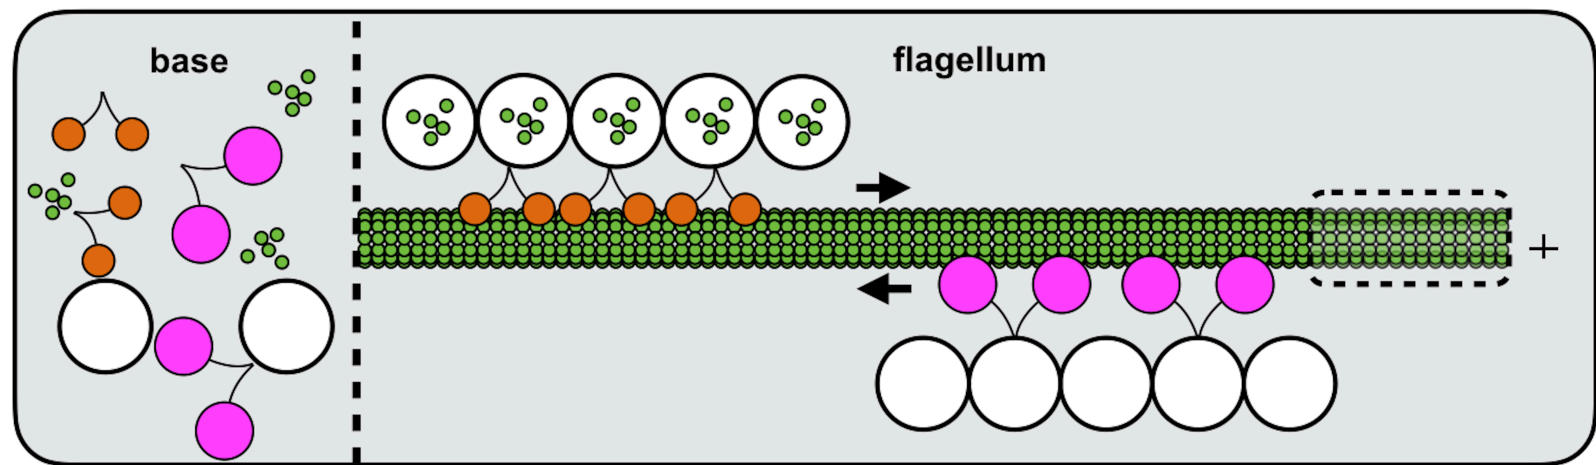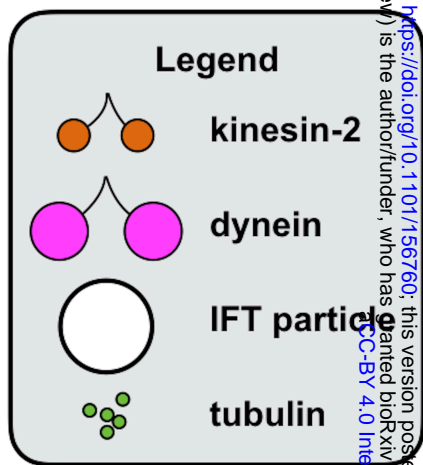

**B**

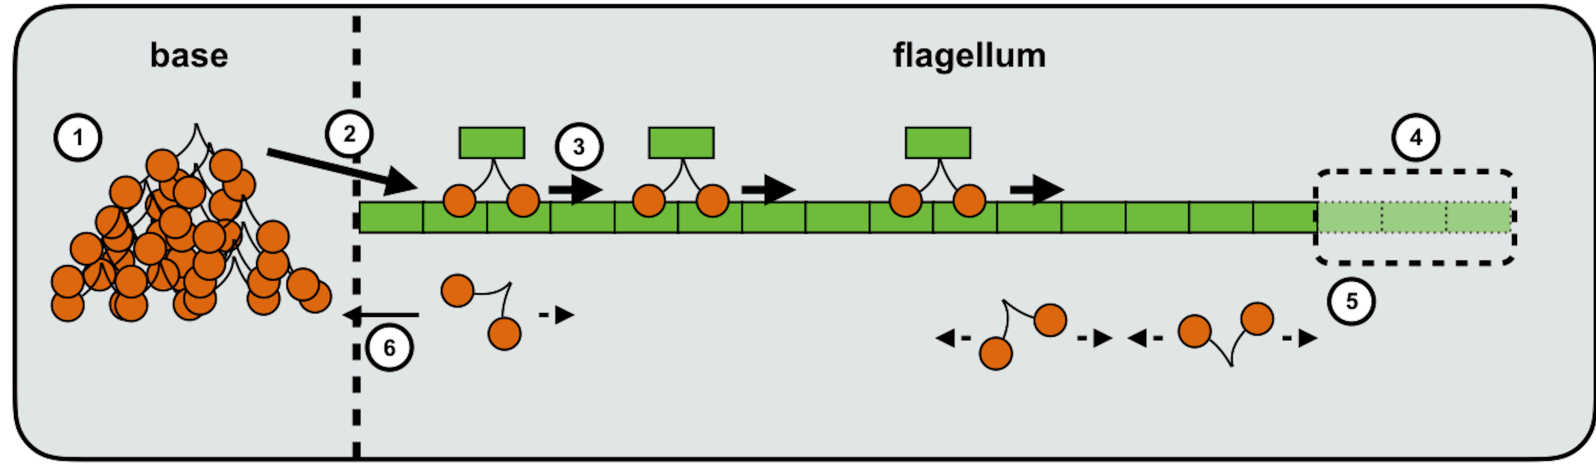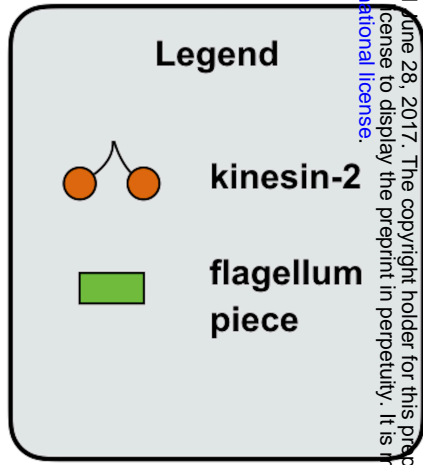

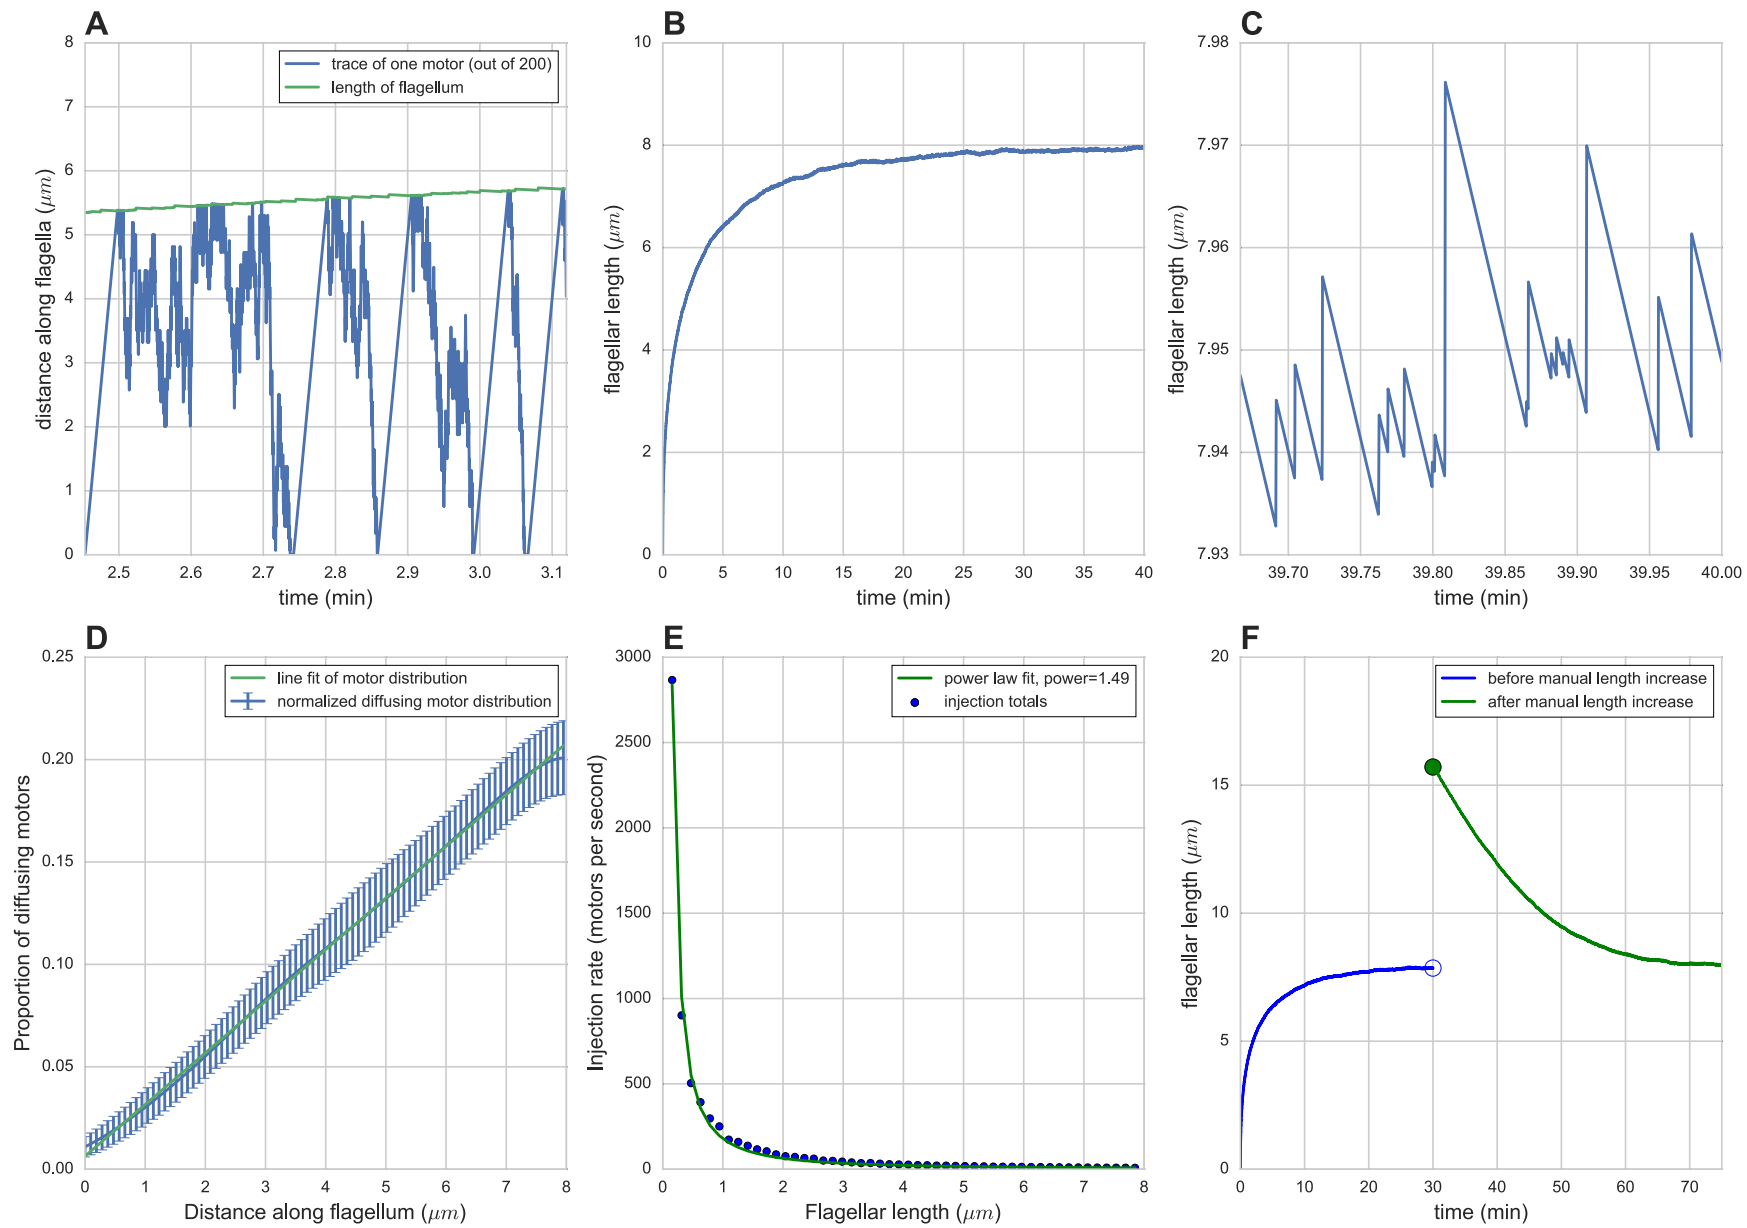

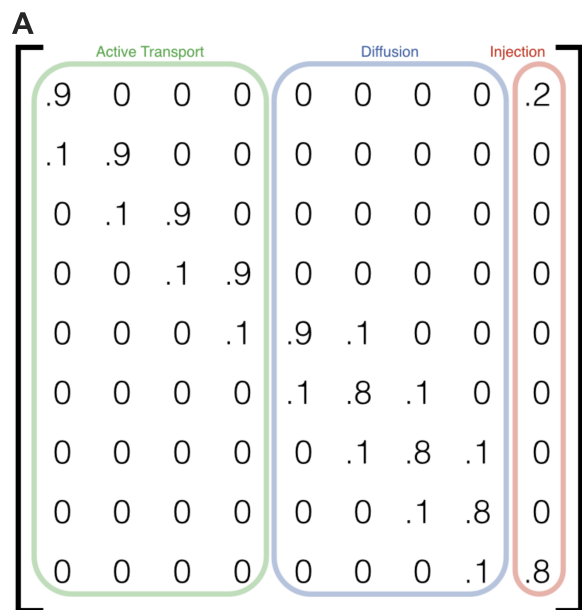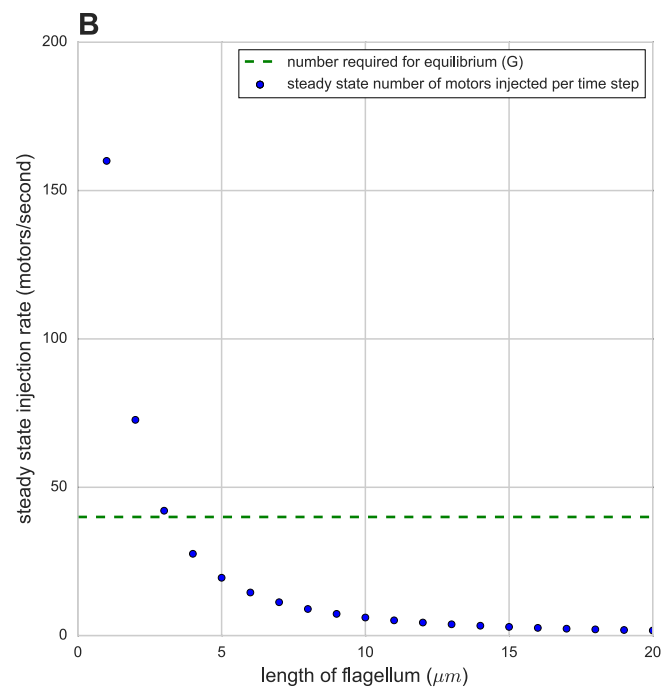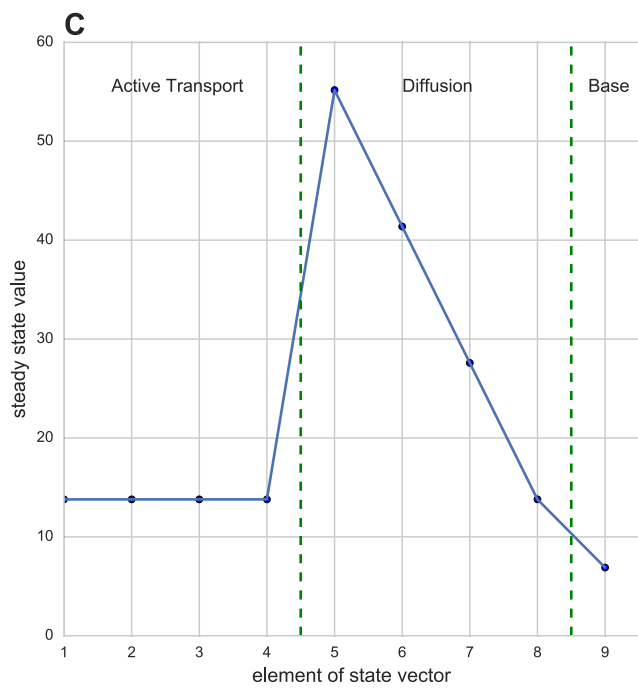

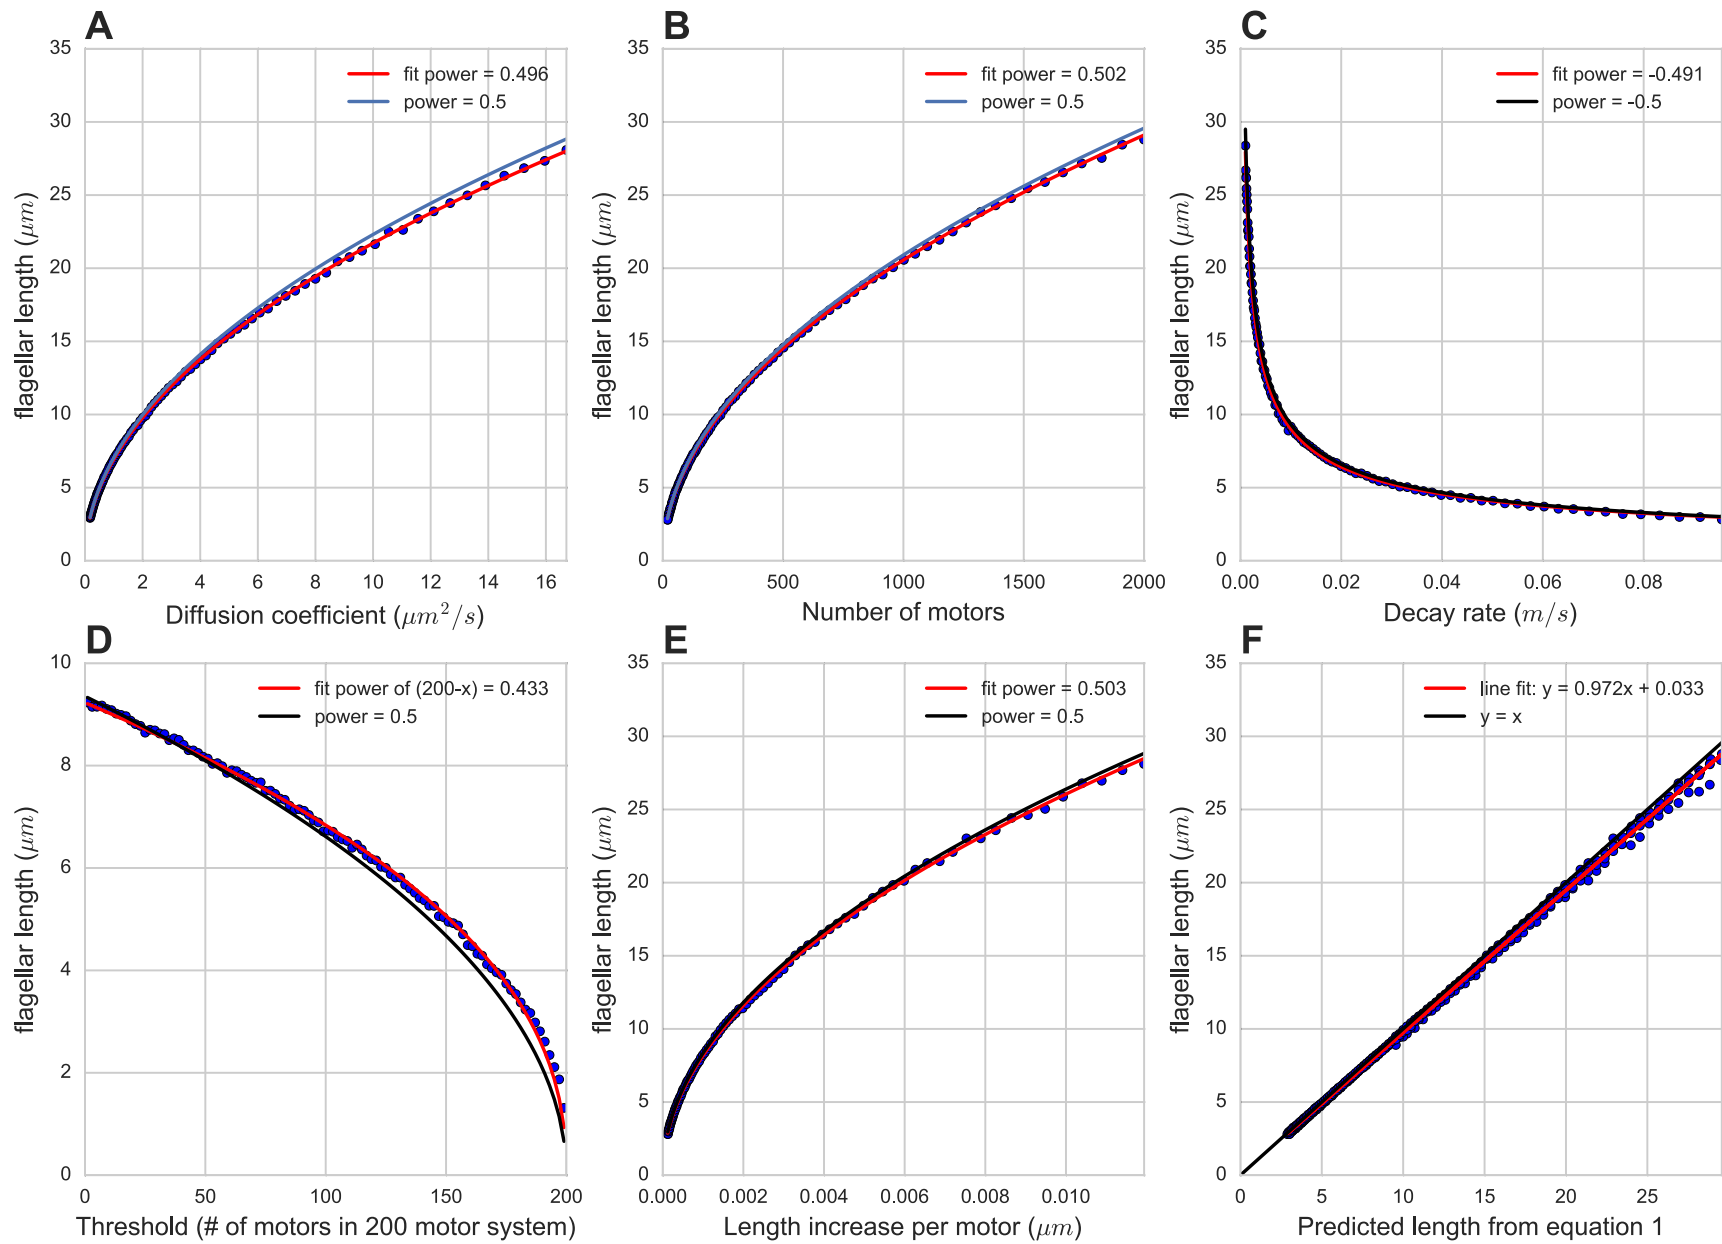

Source: https://www.biorxiv.org/content/10.1101/156760v2.full.pdf
